# Supplementary material for: Taar1 gene variants have a causal role in methamphetamine intake and response and interact with Oprm1
Source: eLife. 2019 Jul 9;8:e46472. doi: 10.7554/eLife.46472 (PMC6682400; doi:10.7554/eLife.46472)
Supplement: Figure 1—source data 1. [file elife-46472-fig1-data1.xlsx]

## Sheet: Sheet1
Animal ID	Genotype	Sex	20 mg/l MA consumption (mg/kg/18h)	40 mg/l MA consumption (mg/kg/18h)	20 mg/l total volume (ml/18h)	40 mg/l total volume (ml/18h)
13.1	knock-in	M	0.487013	0.263598	4.25	4.25
8.1	knock-in	F	0.946705	0.323339	6.05	6.65
12.4	knock-in	M	0.926625	1.68759	4.45	5.15
10.3	knock-in	M	0.319552	0	5.25	5.25
9.4	knock-in	F	0.604651	0.190476	4.35	4.15
9.5	knock-in	F	0.0446429	0	4.25	5.15
11.1	knock-in	F	0.132942	0.336134	4.55	6.05
12.1	knock-in	M	1.13156	0	3.9	4.55
10.1	knock-in	M	0.69736	1.18987	7.25	7.85
9.2	knock-in	F	0.86386	0.822447	5.45	6.05
13.2	knock-in	M	0.5515	0.441176	3.95	4.45
9.1	knock-in	F	0.0454545	9.67626e-16	5.55	4.65
11.2	knock-in	F	0.52381	0	5.25	5.45
9.3	knock-in	F	0.716575	0.192308	4.95	5.05
10.4	knock-in	M	0.196567	0.158103	3.55	3.35
10.2	knock-in	M	0.395248	0.431666	4.65	5.45
8.3	knock-in	F	0.231511	0.917431	4.65	5.25
12.2	knock-in	M	0.489474	0	4.75	5.45
8.2	knock-in	F	0.994054	0.520233	5.25	5.65
12.3	knock-in	M	0.737663	0	4.95	4.75
5.3	control	M	0.541726	3.04442	3.75	5.05
5.5	control	M	2.07364	3.37343	5.05	5.95
3.1	control	M	2.29834	3.21848	5.25	5.85
4.1	control	F	0.128205	3.69168	5.05	5.95
1.1	control	M	0.540228	3.12089	3.85	4.25
4.2	control	F	2.21015	5.61414	4.65	5.05
2.5	control	F	2.02703	5.16848	4.95	5.55
5.1	control	M	0.922487	3.20101	5.45	5.65
5.4	control	M	0.288306	0.912052	3.75	5.15
2.4	control	F	0.0403226	0.337607	4.55	5.35
3.2	control	M	1.23361	3.87305	6.75	5.45
1.2	control	M	1.27203	4.14793	4.65	6.25
5.2	control	M	1.88655	4.78049	5.25	6.25
1.3	control	M	0.998123	3.75491	4.25	5.55
2.1	control	F	1.44411	3.97422	4.2	7.25
2.2	control	F	1.07137	1.17176	5.15	4.75
2.3	control	F	1.8041	2.60105	4.55	4.45
4.3	control	F	2.14278	3.76315	5.55	5.85
6.2	control	F	1.21292	2.50882	3.95	4.65
6.1	control	F	1.98727	3.65258	4.55	5.05
