# Supplementary material for: Taar1 gene variants have a causal role in methamphetamine intake and response and interact with Oprm1
Source: eLife. 2019 Jul 9;8:e46472. doi: 10.7554/eLife.46472 (PMC6682400; doi:10.7554/eLife.46472)
Supplement: Figure 2—source data 1. [file elife-46472-fig2-data1.xlsx]

## Sheet: Sheet1
Animal ID	Genotype	Sex	MA dose (mg/kg)	T0	T30	T60	T90	T120
3.2	control	F	0	38	38.4	37.9	37.6	37.4
5.4	control	F	0	38.2	38.2	38.1	38.1	37.9
1.2	control	F	0	38.5	38.3	38.3	38.2	38.1
3.3	control	F	0	38.4	38.2	38.2	37.7	37.7
1.4	control	F	0	38.8	38.7	38.6	38.3	38.2
5.2	control	F	0	38.4	38.4	38.1	37.8	37.7
3.1	control	F	0	38.5	38.1	37.8	37.6	36.8
16.2	control	F	0	38.8	38.8	38.6	38.4	38.3
21.3	control	F	0	38.8	38.1	37.8	38	38
19.2	control	F	0	37.9	38	37.7	37.8	37.3
21.1	control	F	0	38.9	38.6	38.4	38.3	38
29.1	control	F	0	38.7	38.4	38.1	37.8	37.6
27.1	control	F	0	38.1	38.3	37.5	37.2	37
4.2	control	M	0	37.9	37.8	38	37.7	37.9
2.1	control	M	0	38.2	38.2	37.9	37.8	37.6
4.4	control	M	0	38.1	37.9	38	37.6	37.6
12.2	control	M	0	38.5	37.9	37.6	37.2	37.2
2.3	control	M	0	37.8	38.3	37.9	37.9	37.8
12.4	control	M	0	37.5	37.8	37.8	37.3	36.8
14.3	control	M	0	38.7	38.4	37.6	37.7	37.2
14.1	control	M	0	38.5	39	38.4	38.3	38.6
17.1	control	M	0	37.5	37.1	36.8	36.2	36.1
17.3	control	M	0	37.9	38.2	38.2	37.8	37.9
22.1	control	M	0	38.1	39	38.3	38	37.6
24.2	control	M	0	38.4	38.4	39	38.5	38.4
11.3	knock-in	F	0	38.4	38	37.4	37.4	37.2
6.1	knock-in	F	0	38.9	39	38.6	38.9	38.8
10.4	knock-in	F	0	38	38.2	37.7	37.7	37.6
6.3	knock-in	F	0	38.7	38.3	38.1	37.8	37.6
11.1	knock-in	F	0	38.3	38.5	38.1	38	37.9
10.2	knock-in	F	0	38.2	38.1	37.8	37.8	37.7
13.1	knock-in	F	0	37.8	37.7	37.7	37.7	37.5
15.2	knock-in	F	0	38.5	38.4	38.1	38.4	38.3
13.3	knock-in	F	0	38.6	38.7	38.6	38.4	38.4
23.1	knock-in	F	0	38.4	36.3	37.9	38	37.8
25.1	knock-in	F	0	38.9	38.8	38.4	37.9	37.7
34.1	knock-in	F	0	38.9	38.5	38.5	38.4	38.2
8.3	knock-in	M	0	38.5	38.5	38.3	37.9	37.3
9.1	knock-in	M	0	38.5	38.8	39.1	38.9	38.6
9.3	knock-in	M	0	37.8	38.6	38.9	38.1	37.7
7.1	knock-in	M	0	38.4	38.7	39.1	39.1	38.7
8.1	knock-in	M	0	38.4	38.1	37.4	36.7	36
18.2	knock-in	M	0	38.2	37.6	37.6	37.5	37
20.1	knock-in	M	0	38.9	39.1	39.6	39.2	39.3
26.1	knock-in	M	0	38.8	38.8	38.3	37.5	36.7
30.3	knock-in	M	0	38.9	39.4	39.1	38.6	38.3
30.1	knock-in	M	0	38.7	38.7	38.5	38.4	38.3
28.2	knock-in	M	0	39.9	39.7	39.5	38.8	38.2
32.2	knock-in	M	0	38.7	38.6	38.5	38.5	38.4
1.1	control	F	2	38.1	38.6	38.2	38.5	38.5
5.5	control	F	2	37.4	38.3	38.4	38.4	38.1
1.3	control	F	2	37.6	38.2	38.6	38.6	38.3
1.5	control	F	2	38.4	38.4	38.6	38.6	38.2
5.1	control	F	2	38	38.6	38.7	38.5	38.2
5.3	control	F	2	37.5	38.3	38.6	38.6	37.8
16.1	control	F	2	38.5	38.6	38.8	38.8	38.3
21.2	control	F	2	38.5	38.9	39.2	38.9	39
16.3	control	F	2	38.1	38.6	38.6	38.8	38.6
19.1	control	F	2	38.4	38.8	38.7	38.6	38.4
19.3	control	F	2	37.9	38.4	38.3	38.4	38.1
29.2	control	F	2	38	38.7	38.6	38.8	38.6
27.2	control	F	2	38.6	38.6	38.6	38.6	38.3
12.3	control	M	2	38.6	38	38.1	37.3	37.3
4.1	control	M	2	37.7	38.2	38.3	38.7	38.3
12.5	control	M	2	37.6	38.2	38.8	38.6	38.4
2.2	control	M	2	37.3	38.8	39.2	39.3	39.1
12.1	control	M	2	37.8	38.5	38.7	38.6	38.4
4.3	control	M	2	37.8	38.6	39.2	39.4	39.4
14.2	control	M	2	38.3	39	38.6	38.9	38.6
17.2	control	M	2	38.3	38.7	39.1	39.2	39.6
17.4	control	M	2	38.3	38.7	38.7	38.7	38.8
24.1	control	M	2	38.8	39.6	39.6	39.3	39
33.1	control	M	2	38.1	39	39.1	38.6	38.8
22.2	control	M	2	38.4	38.8	39	38.5	38.8
11.4	knock-in	F	2	38.7	35.6	37.7	38.4	38.6
10.3	knock-in	F	2	38.5	38.6	38.8	38.8	38.5
6.2	knock-in	F	2	38.5	37.7	38.8	38.7	38.4
10.5	knock-in	F	2	37.9	37.4	38.4	38.3	38.3
11.2	knock-in	F	2	38.6	37.5	38.1	38.2	38.5
10.1	knock-in	F	2	38.4	35.1	36.3	37.2	37.8
15.1	knock-in	F	2	38.4	36.9	37.9	38.2	38.4
13.2	knock-in	F	2	38.1	37.7	38.5	38.6	38.4
23.2	knock-in	F	2	38.5	34.8	37.2	37.7	38.1
36.2	knock-in	F	2	39	37.5	38	38	37.9
34.2	knock-in	F	2	38.4	34.5	34.2	33.1	32.9
36.1	knock-in	F	2	38.6	36.5	38	38.4	38.5
8.2	knock-in	M	2	38.5	38.3	38.8	39.4	38.7
8.4	knock-in	M	2	37.7	38.5	39.2	39.7	39.4
9.2	knock-in	M	2	38.4	38.8	39.3	39.5	39.1
7.2	knock-in	M	2	38.9	38.6	39.6	39.6	39.7
20.2	knock-in	M	2	39.1	37.1	38.8	39.8	40
18.1	knock-in	M	2	38.9	39.1	39.3	39.4	39.3
18.3	knock-in	M	2	39.3	38.1	39	38.8	39.4
20.3	knock-in	M	2	39.4	38.5	39.5	39.4	39.4
32.1	knock-in	M	2	39.3	38.4	39.3	38.3	40
26.2	knock-in	M	2	39.1	35.8	39.2	39.3	39.3
28.1	knock-in	M	2	38.3	37.3	33.5	33.5	35.9
30.2	knock-in	M	2	38.8	38.2	39.1	39.1	38.6
