# Supplementary material for: Taar1 gene variants have a causal role in methamphetamine intake and response and interact with Oprm1
Source: eLife. 2019 Jul 9;8:e46472. doi: 10.7554/eLife.46472 (PMC6682400; doi:10.7554/eLife.46472)
Supplement: Figure 3—source data 1. [file elife-46472-fig3-data1.xlsx]

## Sheet: Sheet1
Animal ID	BXD Strain	Taar1	Oprm1	Sex	MA consumption 20 mg/l (mg/kg/18h)	MA consumption 40 mg/l (mg/kg/18h)	total volume consumed collapsed over MA concentration (ml/18h)
24.1	BXD 154	+	B6	M	0	0	4.35
24.2	BXD 154	+	B6	M	0.0462963	0.269058	4.15
24.3	BXD 154	+	B6	M	0.0446429	0	4.675
13.1	BXD 154	+	B6	M	0.045045	0.0888889	4.15
13.2	BXD 154	+	B6	M	0.209911	0.0843882	4.85
23.1	BXD 154	+	B6	F	0.277778	0.111111	4.4
23.2	BXD 154	+	B6	F	0.0578035	0	3.925
23.3	BXD 154	+	B6	F	0.176127	0	3.875
12.1	BXD 154	+	B6	F	0	0.114943	4.675
12.2	BXD 154	+	B6	F	0.167598	0.10929	4.6
12.3	BXD 154	+	B6	F	0.197368	0.38961	3.4
12.4	BXD 154	+	B6	F	0.0561798	0	4.575
12.5	BXD 154	+	B6	F	0	0.115607	4.625
3.3	BXD 184	+	B6	M	0.20679	0	3.65
3.2	BXD 184	+	B6	M	0.122449	0	3.7
3.1	BXD 184	+	B6	M	0.0444444	0.0921659	3.975
38.2	BXD 184	+	B6	M	0.0784314	0.23166	4.3
38.3	BXD 184	+	B6	M	0	0.247934	4.65
38.1	BXD 184	+	B6	M	0.0865801	0.252455	4.65
11.2	BXD 184	+	B6	F	0.0561798	0	4.2
11.1	BXD 184	+	B6	F	1.9337	0.115607	4.425
18.1	BXD 184	+	B6	F	0.0588235	0	3.375
18.2	BXD 184	+	B6	F	0	0	4.25
18.3	BXD 184	+	B6	F	0	0.108696	3.225
9.1	BXD 196	+	B6	M	0.264032	0.252101	4.625
9.2	BXD 196	+	B6	M	0.115128	0.0790514	5.225
6.3	BXD 196	+	B6	M	0.031746	0.0704225	5.075
6.1	BXD 196	+	B6	M	0.188114	0.230216	5.525
6.2	BXD 196	+	B6	M	0.03663	0.0784314	6.925
6.4	BXD 196	+	B6	M	0.188744	0	5.25
10.1	BXD 196	+	B6	F	0.111527	0.229885	4.4
10.2	BXD 196	+	B6	F	0.0458716	0.0909091	5.15
10.3	BXD 196	+	B6	F	0.317822	0.0749064	4.25
11.1	BXD 196	+	B6	F	0.134529	0.438596	4.45
11.2	BXD 196	+	B6	F	0.0384615	0.223342	5.8
11.3	BXD 196	+	B6	F	0.230277	0.0930233	4
11.4	BXD 196	+	B6	F	0.0458716	0.083682	5.7
11.5	BXD 196	+	B6	F	0	0.0900901	4.825
9.1	BXD 212	+	B6	M	0.023753	0.0510204	4.5
9.2	BXD 212	+	B6	M	0.071599	0	4.275
9.3	BXD 212	+	B6	M	0.0274725	0	3.175
5.1	BXD 212	+	B6	M	0.028169	0	3.15
4.1	BXD 212	+	B6	F	0.0387597	0.0809717	3.875
47.3	BXD 218	+	B6	M	0.154786	0.233463	5.4
47.1	BXD 218	+	B6	M	1.80524e-16	0	8.475
47.2	BXD 218	+	B6	M	0.0796813	0.380518	4.8
46.2	BXD 218	+	B6	M	0.0819672	0.237154	5.75
46.1	BXD 218	+	B6	M	0.0823045	0.164609	6.575
45.2	BXD 218	+	B6	F	0.180195	0.275275	10.8
45.3	BXD 218	+	B6	F	0	0.268687	7.3
42.2	BXD 218	+	B6	F	0.17943	0.26987	6.8
42.1	BXD 218	+	B6	F	0.182648	0.275817	7.75
42.3	BXD 218	+	B6	F	0	0.355556	6.725
12.2	BXD 161	+	D2	M	1.1608	1.08333	6.325
14.2	BXD 161	+	D2	M	0.589055	0.148148	8.6
14.3	BXD 161	+	D2	M	0.421094	0.070922	7.475
12.1	BXD 161	+	D2	M	2.45021	0.738725	7.175
14.1	BXD 161	+	D2	M	0.370401	0.79222	10.075
17.1	BXD 161	+	D2	M	1.21555	0.826649	7
17.2	BXD 161	+	D2	M	0.341297	0.13986	7.35
17.3	BXD 161	+	D2	M	0.0380228	0.0740741	7.1
3.3	BXD 161	+	D2	F	0.277006	0	7.3
13.4	BXD 161	+	D2	F	0.442095	0.0873362	7.725
13.2	BXD 161	+	D2	F	1.16592	0.0843882	7.675
13.3	BXD 161	+	D2	F	0.745868	0.24659	8.975
13.1	BXD 161	+	D2	F	0.619935	0.632832	7.175
16.1	BXD 161	+	D2	F	0.267328	1.53846	8.85
33.2	BXD 199	+	D2	M	1.38177	1.91327	6.125
33.1	BXD 199	+	D2	M	1.11669	0.483002	7.475
8.1	BXD 199	+	D2	M	0.20339	0.203851	5.525
8.2	BXD 199	+	D2	M	0.380571	0.0628931	6.075
8.3	BXD 199	+	D2	M	0.566663	0.972345	6.375
10.4	BXD 199	+	D2	M	1.35333	0.35664	6.175
10.1	BXD 199	+	D2	M	0.196508	1.01351	7.825
10.3	BXD 199	+	D2	M	0.374805	0.443038	6.475
10.2	BXD 199	+	D2	M	0.594295	0.725683	4.725
26.1	BXD 199	+	D2	M	1.04012	0.82503	5.75
26.2	BXD 199	+	D2	M	0.166667	0.331494	6.2
32.2	BXD 199	+	D2	F	0.946475	0.17094	5.75
32.1	BXD 199	+	D2	F	1.37666	1.59593	6.425
7.3	BXD 199	+	D2	F	0.511729	0.0833333	5.875
7.5	BXD 199	+	D2	F	0.583333	0.883534	6.425
7.4	BXD 199	+	D2	F	0.328889	0.248665	6.425
7.1	BXD 199	+	D2	F	0.678271	1.7507	6.225
7.2	BXD 199	+	D2	F	0.744852	0.627451	6.35
9.1	BXD 199	+	D2	F	0.881935	0.45977	6.15
9.2	BXD 199	+	D2	F	0.244898	0.0806452	6.075
25.1	BXD 199	+	D2	F	0.0359712	0.0704225	5.3
25.2	BXD 199	+	D2	F	0.204751	0.39874	5.15
25.3	BXD 199	+	D2	F	0.0350877	0	5.925
25.4	BXD 199	+	D2	F	1.16979	0.225564	5.05
27.1	BXD 199	+	D2	F	0.033557	1.65563	6.1
27.2	BXD 199	+	D2	F	0.17602	0.0722022	8.6
27.3	BXD 199	+	D2	F	0.035461	0.0706714	5.5
27.4	BXD 199	+	D2	F	0.479705	0.220588	6.3
37.2	BXD 205	+	D2	M	0.367834	9.50191e-16	5.4
37.1	BXD 205	+	D2	M	0.193237	0.284373	4.775
27.1	BXD 205	+	D2	M	0.0884956	0.0877193	4.375
6.1	BXD 205	+	D2	M	0.0408163	0	4.325
6.2	BXD 205	+	D2	M	0.117187	0.077821	4.3
6.3	BXD 205	+	D2	M	0.127504	0.0840336	3.95
36.1	BXD 205	+	D2	F	0.115607	0.342948	4.525
36.3	BXD 205	+	D2	F	0.57596	0.110497	3.825
36.5	BXD 205	+	D2	F	0.118343	0	4.45
36.2	BXD 205	+	D2	F	1.11732	0.107527	3.425
36.4	BXD 205	+	D2	F	0.11976	0	4.2
24.3	BXD 205	+	D2	F	1.75334e-16	1.26993	3.975
24.1	BXD 205	+	D2	F	0.114943	0.111732	4.125
24.4	BXD 205	+	D2	F	5.55112e-16	0	4.15
24.5	BXD 205	+	D2	F	0	0.11976	4.125
24.2	BXD 205	+	D2	F	0.228639	0.444444	4.65
22.1	BXD 205	+	D2	F	0	0.0990099	3.625
22.2	BXD 205	+	D2	F	0	0	4.25
22.3	BXD 205	+	D2	F	0.0507614	0.315789	3.95
22.4	BXD 205	+	D2	F	0.143541	0.0917431	4.7
5.1	BXD 205	+	D2	F	0.0609756	0.11976	3.55
5.2	BXD 205	+	D2	F	0.0990099	0.0980392	2.825
5.3	BXD 205	+	D2	F	0.0520833	0.104167	4
19.2	BXD 215	+	D2	M	0.211091	0.218715	4.325
18.1	BXD 215	+	D2	F	0.185201	0.281317	4.675
18.5	BXD 215	+	D2	F	0.313596	0.208333	4.55
18.4	BXD 215	+	D2	F	0.293185	0.28893	4.975
18.3	BXD 215	+	D2	F	0.457463	0.0888889	5.575
18.2	BXD 215	+	D2	F	0.200513	0.890114	5.425
31.2	BXD 113	m1J	B6	M	1.51394	7.06133	6.325
31.1	BXD 113	m1J	B6	M	1.17307	3.79692	5.125
27.2	BXD 113	m1J	B6	M	0.704225	2.43136	5.025
27.3	BXD 113	m1J	B6	M	1.53269	2.59592	4.575
2.1	BXD 113	m1J	B6	M	1.57067	2.1286	4.025
2.2	BXD 113	m1J	B6	M	1.14176	3.8099	5.425
2.3	BXD 113	m1J	B6	M	0.735627	1.09368	4.375
22.1	BXD 113	m1J	B6	F	2.51874	6.07561	6.125
26.2	BXD 113	m1J	B6	F	1.94162	4.54994	4.675
26.3	BXD 113	m1J	B6	F	1.67024	4.1626	4.125
26.1	BXD 113	m1J	B6	F	2.01294	4.70698	5.125
26.4	BXD 113	m1J	B6	F	2.4541	4.55067	4.525
3.1	BXD 113	m1J	B6	F	2.39377	3.73901	5.175
1.1	BXD 113	m1J	B6	F	2.22506	4.0671	5.275
1.2	BXD 113	m1J	B6	F	1.89777	3.64423	4.375
3.1	BXD 113	m1J	B6	F	1.61247	1.5229	3.9
3.2	BXD 113	m1J	B6	F	1.37501	4.7509	4.6
3.3	BXD 113	m1J	B6	F	1.08969	2.48299	3.95
3.4	BXD 113	m1J	B6	F	1.03188	3.19697	3.55
3.5	BXD 113	m1J	B6	F	2.86415	4.28835	4.25
29.1	BXD 160	m1J	B6	M	2.85165	4.86516	5.175
29.2	BXD 160	m1J	B6	M	2.83455	4.52541	5.175
21.1	BXD 160	m1J	B6	M	1.7004	4.89128	5.075
21.2	BXD 160	m1J	B6	M	1.42718	2.69188	4.525
8.1	BXD 160	m1J	B6	M	0.518568	5.47126	5.35
8.2	BXD 160	m1J	B6	M	2.23404	3.17814	4.3
28.2	BXD 160	m1J	B6	F	2.46187	7.48784	5.075
28.1	BXD 160	m1J	B6	F	1.77861	3.55388	3.175
7.1	BXD 160	m1J	B6	F	1.98532	3.00076	3.95
7.2	BXD 160	m1J	B6	F	1.07568	1.55792	3.55
2.2	BXD 160	m1J	B6	F	2.243	4.20179	4.425
12.1	BXD 171	m1J	B6	M	2.25681	4.98535	6.425
12.3	BXD 171	m1J	B6	M	0.242215	0.333333	6.575
12.2	BXD 171	m1J	B6	M	2.88863	5.5768	7.775
35.3	BXD 171	m1J	B6	M	2.61187	3.16704	5.825
35.1	BXD 171	m1J	B6	M	2.17089	4.26804	6.125
35.2	BXD 171	m1J	B6	M	2.38362	3.60135	7.075
34.2	BXD 171	m1J	B6	F	2.65389	4.54087	6.475
34.4	BXD 171	m1J	B6	F	2.64748	6.01852	6.475
34.3	BXD 171	m1J	B6	F	3.96396	3.85338	7.325
34.1	BXD 171	m1J	B6	F	2.79244	6.44643	7.725
15.2	BXD 171	m1J	B6	F	1.64314	0.740741	5.075
15.3	BXD 171	m1J	B6	F	2.63146	2.34177	6.125
15.4	BXD 171	m1J	B6	F	1.81955	1.92011	5.075
15.1	BXD 171	m1J	B6	F	3.10209	6.45685	6.625
8.1	BXD 194	m1J	B6	M	1.7763	4.836	5.425
6.2	BXD 194	m1J	B6	M	0.136519	0.0666667	5.425
6.1	BXD 194	m1J	B6	M	3.72161	4.33333	6.325
15.1	BXD 194	m1J	B6	M	1.21776	3.39371	5.1
15.2	BXD 194	m1J	B6	M	1.69559	2.52014	6
15.3	BXD 194	m1J	B6	M	0.0931677	0.185951	5.4
5.1	BXD 194	m1J	B6	F	2.61226	3.9823	5.625
5.2	BXD 194	m1J	B6	F	4.94358	6.99682	6.675
5.3	BXD 194	m1J	B6	F	0.489829	4.08679	6.475
14.1	BXD 194	m1J	B6	F	3.01038	1.74174	5.45
14.2	BXD 194	m1J	B6	F	0.113208	0.0746269	6.3
14.3	BXD 194	m1J	B6	F	0	2.06897	4.4
10.1	BXD 178	m1J	D2	M	2.29858	4.63363	5.075
10.3	BXD 178	m1J	D2	M	2.60857	3.2857	6.075
10.2	BXD 178	m1J	D2	M	2.49439	5.57288	6.275
17.2	BXD 178	m1J	D2	M	2.31047	4.64805	6.025
17.1	BXD 178	m1J	D2	M	1.68244	5.67068	4.825
5.3	BXD 178	m1J	D2	M	2.18354	5.72328	5.375
16.1	BXD 178	m1J	D2	F	2.80542	5.98305	7.525
16.3	BXD 178	m1J	D2	F	1.83178	3.41114	5.475
16.2	BXD 178	m1J	D2	F	2.84191	5.2985	5.825
4.2	BXD 178	m1J	D2	F	1.87559	4.82457	6.725
4.4	BXD 178	m1J	D2	F	3.36757	6.22877	5.975
4.3	BXD 178	m1J	D2	F	2.18744	6.01248	5.775
1.1	BXD 178	m1J	D2	F	0.7173	5.15426	6.075
1.2	BXD 178	m1J	D2	F	1.63347	6.30824	7.5
1.3	BXD 178	m1J	D2	F	4.83786	7.34653	7.35
4.2	BXD 186	m1J	D2	M	0.272727	4.18352	5.225
4.1	BXD 186	m1J	D2	M	2.42756	4.35088	6.45
44.2	BXD 186	m1J	D2	F	2.38061	3.14066	6.35
44.1	BXD 186	m1J	D2	F	2.74041	7.79915	5.575
44.5	BXD 186	m1J	D2	F	1.74359	2.48756	5.7
44.3	BXD 186	m1J	D2	F	0.914508	8.51003	5.85
3.2	BXD 186	m1J	D2	F	1.26829	2.56468	6.175
23.1	BXD 204	m1J	D2	M	0.329218	1.60643	5.7
23.2	BXD 204	m1J	D2	M	2.14428	4.9398	4.925
2.1	BXD 204	m1J	D2	M	0.0374532	0	4.475
2.3	BXD 204	m1J	D2	M	0.483271	2.59234	3.7
22.3	BXD 204	m1J	D2	F	2.54377	6.018	5.175
22.2	BXD 204	m1J	D2	F	3.39165	4.62024	5.825
22.4	BXD 204	m1J	D2	F	0.496572	3.21023	4.975
7.2	BXD 210	m1J	D2	M	2.41533	9.81212	6.925
7.4	BXD 210	m1J	D2	M	3.96692	8.81039	7.775
7.1	BXD 210	m1J	D2	M	2.39933	5.3719	5.875
7.3	BXD 210	m1J	D2	M	2.61563	5.21062	6.975
20.2	BXD 210	m1J	D2	M	2.24695	4.56	5.6
21.1	BXD 210	m1J	D2	F	2.56901	7.63519	6.35
21.2	BXD 210	m1J	D2	F	3.41436	8.99364	6.75
21.3	BXD 210	m1J	D2	F	1.31229	5.62092	6.5
1.5	BXD 210	m1J	D2	F	3.30982	6.9899	6.575
1.1	BXD 210	m1J	D2	F	2.89916	4.91758	5.375
1.4	BXD 210	m1J	D2	F	2.94454	5.18942	6.575
1.3	BXD 210	m1J	D2	F	2.51099	5.12052	5.425
1.2	BXD 210	m1J	D2	F	0.535313	5.14925	5.975
40.3	BXD 216	m1J	D2	M	2.49005	4.63664	6.7
41.1	BXD 216	m1J	D2	M	1.82482	4.43521	6.7
40.2	BXD 216	m1J	D2	M	2.52874	4.67906	6.5
40.1	BXD 216	m1J	D2	M	3.36437	7.08065	7.75
41.2	BXD 216	m1J	D2	M	2.15455	3.97403	7.7
43.1	BXD 216	m1J	D2	F	1.41773	0.180995	5.875
43.2	BXD 216	m1J	D2	F	3.4632	8.04553	6.95
39.1	BXD 216	m1J	D2	F	4.40189	5.69312	6.2
39.3	BXD 216	m1J	D2	F	0.707978	5.3762	7.2
39.2	BXD 216	m1J	D2	F	0.711536	10.9874	7.45
