# Supplementary material for: Taar1 gene variants have a causal role in methamphetamine intake and response and interact with Oprm1
Source: eLife. 2019 Jul 9;8:e46472. doi: 10.7554/eLife.46472 (PMC6682400; doi:10.7554/eLife.46472)
Supplement: Figure 4—source data 1. [file elife-46472-fig4-data1.xlsx]

## Sheet: Sheet1
Animal ID	BXD Strain	Taar1	Oprm1	Sex	MA consumption 20 mg/l (mg/kg/18h)	MA consumption 40 mg/l (mg/kg/18h)	total volume comsumed 20 mg/l (ml/18h)	total volume consumed 40 mg/l (ml/18h)
24.1	BXD 154	+	B6	M	0	0	4.3	4.4
24.2	BXD 154	+	B6	M	0.0462963	0.269058	3.85	4.45
24.3	BXD 154	+	B6	M	0.0446429	0	4.45	4.9
13.1	BXD 154	+	B6	M	0.045045	0.0888889	4.25	4.05
13.2	BXD 154	+	B6	M	0.209911	0.0843882	4.95	4.75
23.1	BXD 154	+	B6	F	0.277778	0.111111	4.05	4.75
23.2	BXD 154	+	B6	F	0.0578035	0	3.75	4.1
23.3	BXD 154	+	B6	F	0.176127	0	4.15	3.6
12.1	BXD 154	+	B6	F	0	0.114943	4.6	4.75
12.2	BXD 154	+	B6	F	0.167598	0.10929	4.35	4.85
12.3	BXD 154	+	B6	F	0.197368	0.38961	3.05	3.75
12.4	BXD 154	+	B6	F	0.0561798	0	4.85	4.3
12.5	BXD 154	+	B6	F	0	0.115607	4.5	4.75
3.3	BXD 184	+	B6	M	0.20679	0	3.8	3.5
3.2	BXD 184	+	B6	M	0.122449	0	4	3.4
3.1	BXD 184	+	B6	M	0.0444444	0.0921659	4	3.95
38.2	BXD 184	+	B6	M	0.0784314	0.23166	4.05	4.55
38.3	BXD 184	+	B6	M	0	0.247934	4.25	5.05
38.1	BXD 184	+	B6	M	0.0865801	0.252455	4.25	5.05
11.2	BXD 184	+	B6	F	0.0561798	0	4.4	4
11.1	BXD 184	+	B6	F	1.9337	0.115607	4.3	4.55
18.1	BXD 184	+	B6	F	0.0588235	0	3.25	3.5
18.2	BXD 184	+	B6	F	0	0	4	4.5
18.3	BXD 184	+	B6	F	0	0.108696	3.2	3.25
9.1	BXD 196	+	B6	M	0.264032	0.252101	4.7	4.55
9.2	BXD 196	+	B6	M	0.115128	0.0790514	5.2	5.25
6.3	BXD 196	+	B6	M	0.031746	0.0704225	5.1	5.05
6.1	BXD 196	+	B6	M	0.188114	0.230216	5.5	5.55
6.2	BXD 196	+	B6	M	0.03663	0.0784314	6.7	7.15
6.4	BXD 196	+	B6	M	0.188744	0	4.6	5.9
10.1	BXD 196	+	B6	F	0.111527	0.229885	3.95	4.85
10.2	BXD 196	+	B6	F	0.0458716	0.0909091	4.35	5.95
10.3	BXD 196	+	B6	F	0.317822	0.0749064	4.15	4.35
11.1	BXD 196	+	B6	F	0.134529	0.438596	3.45	5.45
11.2	BXD 196	+	B6	F	0.0384615	0.223342	4.25	7.35
11.3	BXD 196	+	B6	F	0.230277	0.0930233	3.65	4.35
11.4	BXD 196	+	B6	F	0.0458716	0.083682	5.05	6.35
11.5	BXD 196	+	B6	F	0	0.0900901	4.2	5.45
9.1	BXD 212	+	B6	M	0.023753	0.0510204	4.35	4.65
9.2	BXD 212	+	B6	M	0.071599	0	4.25	4.3
9.3	BXD 212	+	B6	M	0.0274725	0	3.25	3.1
5.1	BXD 212	+	B6	M	0.028169	0	2.9	3.4
4.1	BXD 212	+	B6	F	0.0387597	0.0809717	3.8	3.95
47.3	BXD 218	+	B6	M	0.154786	0.233463	5.05	5.75
47.1	BXD 218	+	B6	M	1.80524e-16	0	7.85	9.1
47.2	BXD 218	+	B6	M	0.0796813	0.380518	4.55	5.05
46.2	BXD 218	+	B6	M	0.0819672	0.237154	5.15	6.35
46.1	BXD 218	+	B6	M	0.0823045	0.164609	6.35	6.8
45.2	BXD 218	+	B6	F	0.180195	0.275275	10.45	11.15
45.3	BXD 218	+	B6	F	0	0.268687	6.85	7.75
42.2	BXD 218	+	B6	F	0.17943	0.26987	6.55	7.05
42.1	BXD 218	+	B6	F	0.182648	0.275817	7.65	7.85
42.3	BXD 218	+	B6	F	0	0.355556	7.25	6.2
12.2	BXD 161	+	D2	M	1.1608	1.08333	6.15	6.5
14.2	BXD 161	+	D2	M	0.589055	0.148148	8.45	8.75
14.3	BXD 161	+	D2	M	0.421094	0.070922	7.45	7.5
12.1	BXD 161	+	D2	M	2.45021	0.738725	6.75	7.6
14.1	BXD 161	+	D2	M	0.370401	0.79222	9.95	10.2
17.1	BXD 161	+	D2	M	1.21555	0.826649	6.65	7.35
17.2	BXD 161	+	D2	M	0.341297	0.13986	6.7	8
17.3	BXD 161	+	D2	M	0.0380228	0.0740741	6.85	7.35
3.3	BXD 161	+	D2	F	0.277006	0	6.85	7.75
13.4	BXD 161	+	D2	F	0.442095	0.0873362	8.25	7.2
13.2	BXD 161	+	D2	F	1.16592	0.0843882	7.45	7.9
13.3	BXD 161	+	D2	F	0.745868	0.24659	8.95	9
13.1	BXD 161	+	D2	F	0.619935	0.632832	7.15	7.2
16.1	BXD 161	+	D2	F	0.267328	1.53846	8.05	9.65
33.2	BXD 199	+	D2	M	1.38177	1.91327	5.65	6.6
33.1	BXD 199	+	D2	M	1.11669	0.483002	7.45	7.5
8.1	BXD 199	+	D2	M	0.20339	0.203851	5.45	5.6
8.2	BXD 199	+	D2	M	0.380571	0.0628931	5.75	6.4
8.3	BXD 199	+	D2	M	0.566663	0.972345	6.35	6.4
10.4	BXD 199	+	D2	M	1.35333	0.35664	5.85	6.5
10.1	BXD 199	+	D2	M	0.196508	1.01351	7.15	8.5
10.3	BXD 199	+	D2	M	0.374805	0.443038	5.95	7
10.2	BXD 199	+	D2	M	0.594295	0.725683	4.45	5
26.1	BXD 199	+	D2	M	1.04012	0.82503	5.35	6.15
26.2	BXD 199	+	D2	M	0.166667	0.331494	6.05	6.35
32.2	BXD 199	+	D2	F	0.946475	0.17094	5.65	5.85
32.1	BXD 199	+	D2	F	1.37666	1.59593	6.35	6.5
7.3	BXD 199	+	D2	F	0.511729	0.0833333	5.95	5.8
7.5	BXD 199	+	D2	F	0.583333	0.883534	6.75	6.1
7.4	BXD 199	+	D2	F	0.328889	0.248665	5.85	7
7.1	BXD 199	+	D2	F	0.678271	1.7507	6.15	6.3
7.2	BXD 199	+	D2	F	0.744852	0.627451	5.75	6.95
9.1	BXD 199	+	D2	F	0.881935	0.45977	5.95	6.35
9.2	BXD 199	+	D2	F	0.244898	0.0806452	5.85	6.3
25.1	BXD 199	+	D2	F	0.0359712	0.0704225	4.85	5.75
25.2	BXD 199	+	D2	F	0.204751	0.39874	5.25	5.05
25.3	BXD 199	+	D2	F	0.0350877	0	5.85	6
25.4	BXD 199	+	D2	F	1.16979	0.225564	4.65	5.45
27.1	BXD 199	+	D2	F	0.033557	1.65563	5.35	6.85
27.2	BXD 199	+	D2	F	0.17602	0.0722022	7.25	9.95
27.3	BXD 199	+	D2	F	0.035461	0.0706714	5.15	5.85
27.4	BXD 199	+	D2	F	0.479705	0.220588	6.35	6.25
37.2	BXD 205	+	D2	M	0.367834	9.50191e-16	5.95	4.85
37.1	BXD 205	+	D2	M	0.193237	0.284373	4.85	4.7
27.1	BXD 205	+	D2	M	0.0884956	0.0877193	4.25	4.5
6.1	BXD 205	+	D2	M	0.0408163	0	4.15	4.5
6.2	BXD 205	+	D2	M	0.117187	0.077821	4.05	4.55
6.3	BXD 205	+	D2	M	0.127504	0.0840336	3.95	3.95
36.1	BXD 205	+	D2	F	0.115607	0.342948	4.75	4.3
36.3	BXD 205	+	D2	F	0.57596	0.110497	3.25	4.4
36.5	BXD 205	+	D2	F	0.118343	0	4.65	4.25
36.2	BXD 205	+	D2	F	1.11732	0.107527	2.75	4.1
36.4	BXD 205	+	D2	F	0.11976	0	4.25	4.15
24.3	BXD 205	+	D2	F	1.75334e-16	1.26993	4.55	3.4
24.1	BXD 205	+	D2	F	0.114943	0.111732	4.05	4.2
24.4	BXD 205	+	D2	F	5.55112e-16	0	4.15	4.15
24.5	BXD 205	+	D2	F	0	0.11976	4.35	3.9
24.2	BXD 205	+	D2	F	0.228639	0.444444	4.95	4.35
22.1	BXD 205	+	D2	F	0	0.0990099	3.2	4.05
22.2	BXD 205	+	D2	F	0	0	4	4.5
22.3	BXD 205	+	D2	F	0.0507614	0.315789	3.75	4.15
22.4	BXD 205	+	D2	F	0.143541	0.0917431	4.75	4.65
5.1	BXD 205	+	D2	F	0.0609756	0.11976	3.35	3.75
5.2	BXD 205	+	D2	F	0.0990099	0.0980392	2	3.65
5.3	BXD 205	+	D2	F	0.0520833	0.104167	3.65	4.35
19.2	BXD 215	+	D2	M	0.211091	0.218715	3.95	4.7
18.1	BXD 215	+	D2	F	0.185201	0.281317	4.65	4.7
18.5	BXD 215	+	D2	F	0.313596	0.208333	4.25	4.85
18.4	BXD 215	+	D2	F	0.293185	0.28893	5.15	4.8
18.3	BXD 215	+	D2	F	0.457463	0.0888889	5.75	5.4
18.2	BXD 215	+	D2	F	0.200513	0.890114	4.95	5.9
31.2	BXD 113	m1J	B6	M	1.51394	7.06133	5.65	7
31.1	BXD 113	m1J	B6	M	1.17307	3.79692	5.05	5.2
27.2	BXD 113	m1J	B6	M	0.704225	2.43136	4.95	5.1
27.3	BXD 113	m1J	B6	M	1.53269	2.59592	4.65	4.5
2.1	BXD 113	m1J	B6	M	1.57067	2.1286	3.75	4.3
2.2	BXD 113	m1J	B6	M	1.14176	3.8099	5.35	5.5
2.3	BXD 113	m1J	B6	M	0.735627	1.09368	3.85	4.9
22.1	BXD 113	m1J	B6	F	2.51874	6.07561	5.55	6.7
26.2	BXD 113	m1J	B6	F	1.94162	4.54994	4.85	4.5
26.3	BXD 113	m1J	B6	F	1.67024	4.1626	4.45	3.8
26.1	BXD 113	m1J	B6	F	2.01294	4.70698	5.15	5.1
26.4	BXD 113	m1J	B6	F	2.4541	4.55067	4.75	4.3
3.1	BXD 113	m1J	B6	F	2.39377	3.73901	5.25	5.1
1.1	BXD 113	m1J	B6	F	2.22506	4.0671	5.25	5.3
1.2	BXD 113	m1J	B6	F	1.89777	3.64423	3.95	4.8
3.1	BXD 113	m1J	B6	F	1.61247	1.5229	3.55	4.25
3.2	BXD 113	m1J	B6	F	1.37501	4.7509	3.55	5.65
3.3	BXD 113	m1J	B6	F	1.08969	2.48299	3.75	4.15
3.4	BXD 113	m1J	B6	F	1.03188	3.19697	3.05	4.05
3.5	BXD 113	m1J	B6	F	2.86415	4.28835	3.85	4.65
29.1	BXD 160	m1J	B6	M	2.85165	4.86516	5.05	5.3
29.2	BXD 160	m1J	B6	M	2.83455	4.52541	5.15	5.2
21.1	BXD 160	m1J	B6	M	1.7004	4.89128	4.15	6
21.2	BXD 160	m1J	B6	M	1.42718	2.69188	4.35	4.7
8.1	BXD 160	m1J	B6	M	0.518568	5.47126	5.65	5.05
8.2	BXD 160	m1J	B6	M	2.23404	3.17814	4.25	4.35
28.2	BXD 160	m1J	B6	F	2.46187	7.48784	4.55	5.6
28.1	BXD 160	m1J	B6	F	1.77861	3.55388	3.25	3.1
7.1	BXD 160	m1J	B6	F	1.98532	3.00076	3.85	4.05
7.2	BXD 160	m1J	B6	F	1.07568	1.55792	3.75	3.35
2.2	BXD 160	m1J	B6	F	2.243	4.20179	4.5	4.35
12.1	BXD 171	m1J	B6	M	2.25681	4.98535	6.2	6.65
12.3	BXD 171	m1J	B6	M	0.242215	0.333333	6.4	6.75
12.2	BXD 171	m1J	B6	M	2.88863	5.5768	7.6	7.95
35.3	BXD 171	m1J	B6	M	2.61187	3.16704	5.65	6
35.1	BXD 171	m1J	B6	M	2.17089	4.26804	6.15	6.1
35.2	BXD 171	m1J	B6	M	2.38362	3.60135	7.15	7
34.2	BXD 171	m1J	B6	F	2.65389	4.54087	5.65	7.3
34.4	BXD 171	m1J	B6	F	2.64748	6.01852	6.25	6.7
34.3	BXD 171	m1J	B6	F	3.96396	3.85338	7.05	7.6
34.1	BXD 171	m1J	B6	F	2.79244	6.44643	7.95	7.5
15.2	BXD 171	m1J	B6	F	1.64314	0.740741	4.15	6
15.3	BXD 171	m1J	B6	F	2.63146	2.34177	5.65	6.6
15.4	BXD 171	m1J	B6	F	1.81955	1.92011	4.45	5.7
15.1	BXD 171	m1J	B6	F	3.10209	6.45685	6.35	6.9
8.1	BXD 194	m1J	B6	M	1.7763	4.836	5	5.85
6.2	BXD 194	m1J	B6	M	0.136519	0.0666667	5.65	5.2
6.1	BXD 194	m1J	B6	M	3.72161	4.33333	6.85	5.8
15.1	BXD 194	m1J	B6	M	1.21776	3.39371	4.95	5.25
15.2	BXD 194	m1J	B6	M	1.69559	2.52014	5.55	6.45
15.3	BXD 194	m1J	B6	M	0.0931677	0.185951	5.25	5.55
5.1	BXD 194	m1J	B6	F	2.61226	3.9823	5.85	5.4
5.2	BXD 194	m1J	B6	F	4.94358	6.99682	7.05	6.3
5.3	BXD 194	m1J	B6	F	0.489829	4.08679	6.45	6.5
14.1	BXD 194	m1J	B6	F	3.01038	1.74174	5.05	5.85
14.2	BXD 194	m1J	B6	F	0.113208	0.0746269	6.25	6.35
14.3	BXD 194	m1J	B6	F	0	2.06897	4.5	4.3
10.1	BXD 178	m1J	D2	M	2.29858	4.63363	4.5	5.65
10.3	BXD 178	m1J	D2	M	2.60857	3.2857	6.1	6.05
10.2	BXD 178	m1J	D2	M	2.49439	5.57288	5.8	6.75
17.2	BXD 178	m1J	D2	M	2.31047	4.64805	5.75	6.3
17.1	BXD 178	m1J	D2	M	1.68244	5.67068	4.55	5.1
5.3	BXD 178	m1J	D2	M	2.18354	5.72328	4.9	5.85
16.1	BXD 178	m1J	D2	F	2.80542	5.98305	7.15	7.9
16.3	BXD 178	m1J	D2	F	1.83178	3.41114	5.25	5.7
16.2	BXD 178	m1J	D2	F	2.84191	5.2985	6.05	5.6
4.2	BXD 178	m1J	D2	F	1.87559	4.82457	6.6	6.85
4.4	BXD 178	m1J	D2	F	3.36757	6.22877	5.9	6.05
4.3	BXD 178	m1J	D2	F	2.18744	6.01248	5.5	6.05
1.1	BXD 178	m1J	D2	F	0.7173	5.15426	6.15	6
1.2	BXD 178	m1J	D2	F	1.63347	6.30824	7.35	7.65
1.3	BXD 178	m1J	D2	F	4.83786	7.34653	7.05	7.65
4.2	BXD 186	m1J	D2	M	0.272727	4.18352	5.15	5.3
4.1	BXD 186	m1J	D2	M	2.42756	4.35088	6.55	6.35
44.2	BXD 186	m1J	D2	F	2.38061	3.14066	6.45	6.25
44.1	BXD 186	m1J	D2	F	2.74041	7.79915	5.4	5.75
44.5	BXD 186	m1J	D2	F	1.74359	2.48756	5.65	5.75
44.3	BXD 186	m1J	D2	F	0.914508	8.51003	5.05	6.65
3.2	BXD 186	m1J	D2	F	1.26829	2.56468	6.15	6.2
23.1	BXD 204	m1J	D2	M	0.329218	1.60643	5.85	5.55
23.2	BXD 204	m1J	D2	M	2.14428	4.9398	4.75	5.1
2.1	BXD 204	m1J	D2	M	0.0374532	0	4.45	4.5
2.3	BXD 204	m1J	D2	M	0.483271	2.59234	3.45	3.95
22.3	BXD 204	m1J	D2	F	2.54377	6.018	5.15	5.2
22.2	BXD 204	m1J	D2	F	3.39165	4.62024	5.55	6.1
22.4	BXD 204	m1J	D2	F	0.496572	3.21023	4.45	5.5
7.2	BXD 210	m1J	D2	M	2.41533	9.81212	6.8	7.05
7.4	BXD 210	m1J	D2	M	3.96692	8.81039	7.6	7.95
7.1	BXD 210	m1J	D2	M	2.39933	5.3719	4.9	6.85
7.3	BXD 210	m1J	D2	M	2.61563	5.21062	6.7	7.25
20.2	BXD 210	m1J	D2	M	2.24695	4.56	5.35	5.85
21.1	BXD 210	m1J	D2	F	2.56901	7.63519	6.05	6.65
21.2	BXD 210	m1J	D2	F	3.41436	8.99364	6.95	6.55
21.3	BXD 210	m1J	D2	F	1.31229	5.62092	6.25	6.75
1.5	BXD 210	m1J	D2	F	3.30982	6.9899	6.1	7.05
1.1	BXD 210	m1J	D2	F	2.89916	4.91758	5	5.75
1.4	BXD 210	m1J	D2	F	2.94454	5.18942	6.5	6.65
1.3	BXD 210	m1J	D2	F	2.51099	5.12052	5.3	5.55
1.2	BXD 210	m1J	D2	F	0.535313	5.14925	5.3	6.65
40.3	BXD 216	m1J	D2	M	2.49005	4.63664	7.65	5.75
41.1	BXD 216	m1J	D2	M	1.82482	4.43521	6.25	7.15
40.2	BXD 216	m1J	D2	M	2.52874	4.67906	6.45	6.55
40.1	BXD 216	m1J	D2	M	3.36437	7.08065	7.05	8.45
41.2	BXD 216	m1J	D2	M	2.15455	3.97403	7.35	8.05
43.1	BXD 216	m1J	D2	F	1.41773	0.180995	6.05	5.7
43.2	BXD 216	m1J	D2	F	3.4632	8.04553	6.25	7.65
39.1	BXD 216	m1J	D2	F	4.40189	5.69312	5.65	6.75
39.3	BXD 216	m1J	D2	F	0.707978	5.3762	7.45	6.95
39.2	BXD 216	m1J	D2	F	0.711536	10.9874	7.65	7.25
