# Supplementary material for: Taar1 gene variants have a causal role in methamphetamine intake and response and interact with Oprm1
Source: eLife. 2019 Jul 9;8:e46472. doi: 10.7554/eLife.46472 (PMC6682400; doi:10.7554/eLife.46472)
Supplement: Figure 5—source data 1. [file elife-46472-fig5-data1.xlsx]

## Sheet: Sheet1
Animal ID	BXD Strain	Taar1	Oprm1	Sex	MA dose (mg/kg)	T0	T30	T60	T90	T120
14.1	BXD 154	+	B6	M	0	38.7	38.4	37.8	38	37.8
42.1	BXD 154	+	B6	F	0	38.6	38.1	38.2	38.3	38.4
48.2	BXD 154	+	B6	F	0	38.1	37.7	37.5	37.6	37.6
51.3	BXD 154	+	B6	F	0	38.7	38.2	38.2	37.9	37.9
52.2	BXD 154	+	B6	F	0	38.3	38.2	37.9	37.9	37.7
60.3	BXD 154	+	B6	F	0	38.5	38.2	38.2	38	38.1
61.1	BXD 154	+	B6	M	0	37.8	37.8	37	37	36.6
68.1	BXD 154	+	B6	F	0	38.3	38.4	38.2	38.5	38.6
68.4	BXD 154	+	B6	F	0	38.1	38.2	38	38	38
114.1	BXD 154	+	B6	M	0	37.8	37.2	37.2	36.9	36.8
123.1	BXD 154	+	B6	M	0	37	37.4	37.2	37.2	37.4
70.1	BXD 184	+	B6	M	0	38.1	38.8	38.8	38.8	38.6
96.1	BXD 184	+	B6	F	0	38.1	38	38	37.8	37.9
97.2	BXD 184	+	B6	M	0	37.4	37.6	37.9	37.3	37.3
111.1	BXD 184	+	B6	F	0	38.3	38.1	38.1	38.1	37.9
122.2	BXD 184	+	B6	M	0	37.9	37.8	38	38.1	38.3
145.1	BXD 184	+	B6	M	0	37.6	37.8	37.1	37.4	37.4
157.1	BXD 184	+	B6	F	0	37.9	37.6	37.5	37.7	38
160.2	BXD 184	+	B6	M	0	38.3	38.2	37.9	37.5	37.4
183.1	BXD 184	+	B6	F	0	38.3	38.3	38.2	37.5	37.5
184.1	BXD 184	+	B6	M	0	38.2	37.6	38	38.1	37.8
5.1	BXD 196	+	B6	F	0	38.5	38.6	38.5	38.6	38.3
5.4	BXD 196	+	B6	F	0	38.1	38.5	38.5	38.4	38.3
32.2	BXD196	+	B6	F	0	38.3	38.4	38.4	37.5	37.9
32.5	BXD196	+	B6	F	0	38.4	38.4	38	38	37.9
63.1	BXD 196	+	B6	M	0	38.2	38.8	38.6	37.9	38
104.1	BXD 196	+	B6	F	0	37.7	37.6	37.2	37.7	38.1
104.4	BXD 196	+	B6	F	0	37.9	38	38.1	38	38.2
105.1	BXD 196	+	B6	M	0	38.4	38.4	37.8	37.8	38
105.4	BXD 196	+	B6	M	0	38.7	38.1	37.6	37.6	37.1
164.1	BXD 196	+	B6	M	0	38.8	39.1	39	38.7	38.4
187.1	BXD 196	+	B6	M	0	38.8	38	38	38.3	38.1
188.2	BXD 196	+	B6	M	0	39	38.9	39	38.4	38.4
106.1	BXD 218	+	B6	F	0	37.7	38.2	37.7	38.1	37.8
135.1	BXD 218	+	B6	F	0	38.8	38.7	38.7	38.7	38.6
152.1	BXD 218	+	B6	F	0	38.5	38.2	38.5	38.4	38.1
174.2	BXD 218	+	B6	M	0	38.8	38.3	38.1	37.7	37.8
179.1	BXD 218	+	B6	M	0	38.6	38.3	37.9	37.8	37.6
185.2	BXD 218	+	B6	F	0	39	38.6	38.3	38.2	38.2
186.1	BXD 218	+	B6	M	0	37.9	37.5	37.4	37.6	36.9
189.1	BXD 218	+	B6	F	0	38.4	38.5	38.3	37.7	37.7
190.2	BXD 218	+	B6	F	0	38.8	38.8	38.5	38.2	37.9
1.1	BXD 161	+	D2	F	0	38.3	37.3	37.8	37.4	37.5
1.4	BXD 161	+	D2	F	0	38.3	38.5	37.7	37.4	37.5
2.2	BXD 161	+	D2	M	0	37.8	38.1	37.6	37.4	37.5
46.3	BXD 161	+	D2	F	0	38.3	37.4	37.5	36.9	37.2
55.2	BXD 161	+	D2	F	0	38.2	38.3	38.1	38.2	38.1
65.1	BXD 161	+	D2	M	0	38.4	38	37.8	36.8	37
76.2	BXD 161	+	D2	M	0	37.9	37.4	37.3	37.7	37.8
84.3	BXD 161	+	D2	M	0	38.4	37.7	37.8	37.2	37.9
148.1	BXD 161	+	D2	F	0	38.2	38.1	37.7	37.7	37.8
39.2	BXD 199	+	D2	F	0	38.3	38.1	37.7	37.8	37.6
59.1	BXD 199	+	D2	M	0	38	37.6	37	37.1	37.3
74.2	BXD 199	+	D2	F	0	37.7	38.1	37.9	38.1	37.6
75.1	BXD 199	+	D2	M	0	37.9	37.7	37.8	37.3	36.8
85.3	BXD 199	+	D2	F	0	37.8	37.9	37.6	37.5	38.1
86.1	BXD 199	+	D2	M	0	38	37.4	37.5	37.6	37.6
90.1	BXD 199	+	D2	M	0	37.9	38.7	37.7	37.7	37.8
118.1	BXD 199	+	D2	M	0	37.9	38	37.7	37.6	37.5
128.2	BXD 199	+	D2	F	0	38	37.9	37.9	38.1	38.1
156.1	BXD 199	+	D2	M	0	37.9	37.5	37.5	37.2	37.1
11.1	BXD 205	+	D2	M	0	38.4	38.8	38.7	38.2	38.3
12.2	BXD 205	+	D2	M	0	38.3	37.7	37.9	38.7	38.5
37.2	BXD 205	+	D2	F	0	39	39	38.6	38.6	38.6
38.1	BXD 205	+	D2	M	0	38.2	38.5	38.1	37.6	38.4
47.1	BXD 205	+	D2	M	0	38.3	38.1	38	37.7	37.6
71.3	BXD 205	+	D2	F	0	38.9	39	38.9	38.5	38.5
72.2	BXD 205	+	D2	M	0	38.2	38.4	37.7	37.3	36.4
116.3	BXD 205	+	D2	F	0	38.7	38.4	38.3	38.3	38.5
119.1	BXD 205	+	D2	M	0	38.3	38.4	38.7	38.5	38.3
167.1	BXD 205	+	D2	F	0	38.8	38.1	38.5	38.2	38.2
167.2	BXD 205	+	D2	F	0	38.5	38.6	38.1	38.2	37.8
28.1	BXD 113	m1J	B6	F	0	38.2	38	38.2	38.2	38
29.1	BXD 113	m1J	B6	F	0	38.1	37.4	38.2	38.2	38.6
53.2	BXD 113	m1J	B6	F	0	37.8	38.4	38.4	38.4	38.4
54.1	BXD 113	m1J	B6	M	0	37.4	38.7	37.9	37.9	37.6
56.1	BXD 113	m1J	B6	M	0	38.1	38.6	38.9	38.2	38.1
64.2	BXD 113	m1J	B6	M	0	37.9	38.3	37.8	38.4	38
108.1	BXD 113	m1J	B6	M	0	37.5	38.6	38.3	38.9	39.1
108.3	BXD 113	m1J	B6	M	0	36.9	37.9	37.5	37.9	37.8
115.2	BXD 113	m1J	B6	F	0	38.1	37.9	38.6	38.7	38.8
120.1	BXD 113	m1J	B6	F	0	38.8	38.5	38.3	38.4	38.3
157.2	BXD 113	m1J	B6	F	0	38.2	37.8	37.7	38.8	37.9
171.1	BXD 113	m1J	B6	F	0	38.6	38.5	38.2	37.9	37.8
171.4	BXD 113	m1J	B6	F	0	38.4	38	37.5	37.6	37.2
172.2	BXD 113	m1J	B6	M	0	38.9	38.9	38.2	38.2	38.3
6.1	BXD 160	m1J	B6	F	0	38.4	38.4	38	38.2	37.9
13.2	BXD 160	m1J	B6	F	0	37.9	38.1	37.8	37.6	37.5
42.3	BXD 160	m1J	B6	F	0	37.9	38.2	38.2	37.7	38.3
44.2	BXD 160	m1J	B6	M	0	37.8	38.7	38.4	38.3	38.3
3.1	BXD 171	m1J	B6	F	0	38.1	38	37.7	38.1	37.5
3.4	BXD 171	m1J	B6	F	0	37.8	37.6	37.3	37.7	37.7
4.2	BXD 171	m1J	B6	M	0	37.2	38.3	37.5	37.6	37.1
8.2	BXD 171	m1J	B6	M	0	38.2	38.1	38	38	38
34.2	BXD 171	m1J	B6	F	0	37.4	36.9	36.9	36.8	36.7
142.2	BXD 171	m1J	B6	F	0	38.5	37.8	37.5	37.2	37.2
142.5	BXD 171	m1J	B6	F	0	38.1	37.6	37.4	37.4	37.1
151.1	BXD 171	m1J	B6	M	0	37.3	37.9	37.3	36.7	37
155.1	BXD 171	m1J	B6	M	0	37.1	37.2	36.7	36.3	36.3
192.1	BXD 171	m1J	B6	M	0	38	37.8	36.8	36.7	36.4
9.1	BXD 194	m1J	B6	F	0	38.1	38.2	38.1	37.7	37.8
9.4	BXD 194	m1J	B6	F	0	38.4	38.3	38	37.9	37.8
10.2	BXD 194	m1J	B6	M	0	38.4	38.1	38.4	38.3	37.5
127.1	BXD 194	m1J	B6	M	0	36.4	35.7	37.3	36.8	37.1
129.2	BXD 194	m1J	B6	M	0	38	37.2	37.3	36.8	37.1
130.1	BXD 194	m1J	B6	F	0	38.1	35.1	37.1	37.2	37.3
139.1	BXD 194	m1J	B6	F	0	39.5	38.3	37.1	36.9	37.2
140.1	BXD 194	m1J	B6	M	0	38.4	38.3	38	37.9	37.6
161.4	BXD 194	m1J	B6	F	0	38.2	38	37.5	37.5	37.1
163.1	BXD 194	m1J	B6	M	0	38.1	37.5	37.5	37.4	37.1
33.2	BXD 178	m1J	D2	F	0	38.3	37.9	37.6	37.7	37.3
45.1	BXD 178	m1J	D2	M	0	37.8	37.8	37.6	37.4	36.9
50.1	BXD 178	m1J	D2	M	0	37.3	36.8	36.9	37	37.2
53.1	BXD 178	m1J	D2	F	0	38.5	38.3	38	37.9	38.2
57.2	BXD 178	m1J	D2	F	0	38.1	38.1	38.1	38.2	37.9
58.2	BXD 178	m1J	D2	M	0	37.9	37.8	37.7	37.6	37.6
66.2	BXD 178	m1J	D2	M	0	37.8	37.5	37.2	37	37
67.2	BXD 178	m1J	D2	F	0	37.8	38.2	37.7	37.5	37.4
78.2	BXD 178	m1J	D2	M	0	37.9	38	37.8	37.3	37.9
79.1	BXD 178	m1J	D2	F	0	37.9	38.3	38	37.9	37.7
81.2	BXD 178	m1J	D2	M	0	37.4	37.5	37.6	37.4	37.4
102.2	BXD 178	m1J	D2	F	0	38.4	37.3	38.3	37.7	37.7
103.1	BXD 186	m1J	D2	M	0	36.2	36.9	36	35.7	35.4
132.1	BXD 186	m1J	D2	F	0	38.4	38.1	37.8	37.7	37.6
136.1	BXD 186	m1J	D2	M	0	38.2	37.6	38.1	36.6	36.3
158.3	BXD 186	m1J	D2	M	0	38.2	37.9	38.6	38	37.8
168.1	BXD 186	m1J	D2	F	0	38.1	38	37.6	37.2	37.2
181.1	BXD 186	m1J	D2	F	0	38.9	38.5	38.1	37.7	37.3
181.4	BXD 186	m1J	D2	F	0	38.3	38.4	38.4	37.9	37.2
182.4	BXD 186	m1J	D2	F	0	38.1	38.3	38.1	37.8	37.5
195.1	BXD 186	m1J	D2	F	0	38.8	38.9	38.5	38	38
196.1	BXD 186	m1J	D2	M	0	37.9	38.2	38	37.8	37.7
196.3	BXD 186	m1J	D2	M	0	38.3	38	37.9	37.7	37.5
30.2	BXD210	m1J	D2	F	0	38.6	38.6	38.4	38.3	37.5
31.3	BXD210	m1J	D2	M	0	36.8	36.9	36.5	36.3	36.1
35.2	BXD210	m1J	D2	F	0	37.8	37.9	37.6	37.5	37.2
36.2	BXD210	m1J	D2	M	0	38.4	38.8	38.3	38.1	38.8
153.1	BXD 210	m1J	D2	F	0	38.2	38.5	38.2	38.1	37.5
153.4	BXD 210	m1J	D2	F	0	37.5	37.4	37.4	36.9	36.9
154.1	BXD 210	m1J	D2	M	0	37.8	37.1	36.5	35.9	36
170.1	BXD 210	m1J	D2	F	0	38.4	38.7	38.1	37.8	37.8
193.1	BXD 210	m1J	D2	M	0	38.8	38.7	38.1	37.6	37.5
124.1	BXD 216	m1J	D2	F	0	38.9	38.2	38.3	38.3	38.1
124.4	BXD 216	m1J	D2	F	0	38	38.1	38.1	36	37.8
125.1	BXD 216	m1J	D2	M	0	36.4	37.3	37	37	37.3
133.1	BXD 216	m1J	D2	F	0	38.7	38.6	38.8	37.8	37.8
134.1	BXD 216	m1J	D2	M	0	37.2	36.4	37.2	37.4	37.6
147.2	BXD 216	m1J	D2	M	0	38.3	38.4	38.6	38	38
149.3	BXD 216	m1J	D2	F	0	38	37.8	37.6	37.8	37
165.1	BXD 216	m1J	D2	F	0	38.4	37.3	37.4	37.5	37.1
166.3	BXD 216	m1J	D2	M	0	35.9	36.4	36.5	36.6	35.9
176.1	BXD 216	m1J	D2	F	0	38.5	39	38.9	38.4	38.6
180.2	BXD 216	m1J	D2	M	0	38.3	38	38	37.5	37.6
14.2	BXD 154	+	B6	M	2	37.8	37.2	37.4	38.2	38.8
42.2	BXD 154	+	B6	F	2	38	37.1	38	38.3	38.5
43.1	BXD 154	+	B6	M	2	37.7	37	38.1	38.2	38.1
51.1	BXD 154	+	B6	F	2	38.6	36.9	37.7	35.3	37.9
52.3	BXD 154	+	B6	F	2	38.1	36.2	35.8	36.2	37.5
60.1	BXD 154	+	B6	F	2	38.4	35.7	36	37.5	38.4
60.4	BXD 154	+	B6	F	2	38.3	37.5	36.2	36	38.1
61.2	BXD 154	+	B6	M	2	38.2	35.7	35.5	37.6	38.1
68.2	BXD 154	+	B6	F	2	38.3	37.3	37.9	38	38.4
77.1	BXD 154	+	B6	M	2	37.6	37.9	38	38.3	38.3
112.1	BXD 154	+	B6	F	2	38.1	37.7	38.3	38.5	38.6
112.3	BXD 154	+	B6	F	2	37.6	37.1	37.6	38.1	37.9
114.2	BXD 154	+	B6	M	2	37.1	37.5	38.7	37.8	38
123.2	BXD 154	+	B6	M	2	37.6	37.7	38	38.8	39
73.2	BXD 184	+	B6	F	2	38.4	37.2	38.4	38.6	38.5
96.2	BXD 184	+	B6	F	2	37.4	35.9	37	37.2	37.7
97.1	BXD 184	+	B6	M	2	37.3	35.7	37.9	38.2	38.7
97.3	BXD 184	+	B6	M	2	37	35	36	36.5	36
122.3	BXD 184	+	B6	M	2	38.3	37.5	37.8	37.6	38
144.1	BXD 184	+	B6	F	2	38.1	37.5	38.1	38.5	38.5
145.2	BXD 184	+	B6	M	2	37.1	37.1	36.6	36.8	38
160.1	BXD 184	+	B6	M	2	37.6	36.7	37.8	38.1	37.8
160.4	BXD 184	+	B6	M	2	38.6	36.8	38.4	38	38.6
183.2	BXD 184	+	B6	F	2	38.1	35.1	37.3	37.5	37.7
184.2	BXD 184	+	B6	M	2	38.8	37.5	38.4	38.8	38.6
5.2	BXD 196	+	B6	F	2	38.5	36.6	38	38.2	38.7
5.5	BXD 196	+	B6	F	2	38.1	36.7	37.1	37.9	38.1
32.3	BXD196	+	B6	F	2	38.5	34.9	37	37.9	38.2
40.1	BXD196	+	B6	F	2	38.9	38.2	38.5	39	39
62.2	BXD 196	+	B6	F	2	38.5	37.9	38.4	38.3	38.4
63.2	BXD 196	+	B6	M	2	38.1	35	38.1	38.9	38.8
93.1	BXD 196	+	B6	M	2	38.6	36.9	37.7	37.9	38.8
104.2	BXD 196	+	B6	F	2	37.8	36.9	38	38.1	38.4
105.2	BXD 196	+	B6	M	2	38.7	38.1	38.7	38.9	39
138.1	BXD 196	+	B6	M	2	39.2	36.2	38.5	39.1	38.7
164.2	BXD 196	+	B6	M	2	38.6	37.7	38.2	38.2	37.7
187.2	BXD 196	+	B6	M	2	38.7	37.6	38.8	39.3	38.8
106.2	BXD 218	+	B6	F	2	38.1	37.2	37.5	37.3	37.9
121.2	BXD 218	+	B6	F	2	38.2	37.5	38.2	38.3	38
152.2	BXD 218	+	B6	F	2	38.5	35	35.9	36.4	37.5
159.2	BXD 218	+	B6	F	2	38.3	38.3	38.4	38.6	38.6
175.1	BXD 218	+	B6	M	2	39.2	36.7	37	37.2	37.8
175.3	BXD 218	+	B6	M	2	38.8	37.9	35.5	35	36.2
179.2	BXD 218	+	B6	M	2	39.2	38.1	38.9	38.9	39.1
185.1	BXD 218	+	B6	F	2	38.7	37.6	38.3	37.8	38.6
189.2	BXD 218	+	B6	F	2	38.7	37.3	36.6	36.6	36.9
190.1	BXD 218	+	B6	F	2	38.6	37.7	37.8	37.6	38.3
1.2	BXD 161	+	D2	F	2	37.8	33.3	31.8	31.6	34.4
1.5	BXD 161	+	D2	F	2	37.9	33.3	32.5	31.4	33.6
46.1	BXD 161	+	D2	F	2	38.1	32.7	33.6	35.5	36.8
46.4	BXD 161	+	D2	F	2	38.8	33.5	33	34.6	35.8
76.1	BXD 161	+	D2	M	2	37.6	32.8	32.6	33.7	36.2
80.1	BXD 161	+	D2	F	2	38.6	35.9	36.4	37.5	37.8
83.1	BXD 161	+	D2	F	2	38.2	35.8	38.1	38.1	37.5
84.1	BXD 161	+	D2	M	2	37.8	33	33.3	35.8	36.5
178.1	BXD 161	+	D2	M	2	38.6	36.1	38.2	38.2	38.7
39.3	BXD 199	+	D2	F	2	38.3	35.6	34.6	34.7	36.5
59.2	BXD 199	+	D2	M	2	38.1	34.8	34.7	35.2	37.2
74.3	BXD 199	+	D2	F	2	37.9	35.4	34.1	34.4	36.8
75.2	BXD 199	+	D2	M	2	37.6	33.9	35.1	34.6	35.1
75.4	BXD 199	+	D2	M	2	38	36	34.4	34.5	35.3
85.2	BXD 199	+	D2	F	2	37.8	35	33.7	35.3	36.4
86.3	BXD 199	+	D2	M	2	38	34.9	34.2	34.4	34.3
90.3	BXD 199	+	D2	M	2	38.2	35.3	33.7	34.8	34.8
117.2	BXD 199	+	D2	F	2	38.6	35.4	35.3	36.1	37.1
118.2	BXD 199	+	D2	M	2	38.1	35.2	34.4	32.9	36
11.2	BXD 205	+	D2	M	2	38.6	38	39.1	39.2	39.2
27.1	BXD 205	+	D2	M	2	38.1	36.8	38.9	38.7	38.6
38.2	BXD 205	+	D2	M	2	38.5	38.2	38.6	38.6	38.8
47.2	BXD 205	+	D2	M	2	38.4	35.2	38.2	39.2	39.6
71.1	BXD 205	+	D2	F	2	38	38.1	38.6	38.5	38.6
72.3	BXD 205	+	D2	M	2	38.4	37	38.2	38.2	38.2
92.2	BXD 205	+	D2	M	2	38.2	35.3	38.7	39.2	39.5
116.1	BXD 205	+	D2	F	2	38.5	37.4	38.2	38.4	38.2
116.4	BXD 205	+	D2	F	2	38.2	36.6	37.2	37.8	37.9
147.1	BXD 205	+	D2	M	2	38	37.2	38.5	38.6	38.9
167.3	BXD 205	+	D2	F	2	38.2	34.6	36.5	37.2	38.2
167.4	BXD 205	+	D2	F	2	38.6	36.7	37.5	38.1	38
28.2	BXD 113	m1J	B6	F	2	37.8	38.9	39.1	39.1	39.1
29.2	BXD 113	m1J	B6	F	2	38.1	38.8	39	39	39.1
54.2	BXD 113	m1J	B6	M	2	38.5	39.8	39.8	39.9	40
55.1	BXD 113	m1J	B6	F	2	39.9	39.1	39.7	39.6	39.7
56.2	BXD 113	m1J	B6	M	2	39	39.8	39.6	39.6	39.3
64.1	BXD 113	m1J	B6	M	2	37.3	39.2	39.6	39.3	39.8
64.4	BXD 113	m1J	B6	M	2	37.3	38.8	39.1	39.4	38.8
91.2	BXD 113	m1J	B6	M	2	36.6	39	39	39.6	39.5
107.2	BXD 113	m1J	B6	F	2	38	38.9	39.2	39.1	39
115.3	BXD 113	m1J	B6	F	2	37.9	39.1	39.1	39.3	39.1
120.2	BXD 113	m1J	B6	F	2	38.7	38.6	38.9	38.9	38.9
157.3	BXD 113	m1J	B6	F	2	37.9	38	38.4	38.6	39
171.2	BXD 113	m1J	B6	F	2	38.3	38.8	39.1	38.9	39.1
172.1	BXD 113	m1J	B6	M	2	38.3	39	39.3	39.1	38.5
172.4	BXD 113	m1J	B6	M	2	38.2	38.6	39.3	39.3	39.1
6.2	BXD 160	m1J	B6	F	2	38.4	38.1	38.6	38.4	38.6
13.3	BXD 160	m1J	B6	F	2	37.3	36.5	37.8	38	37.6
44.3	BXD 160	m1J	B6	M	2	38.5	38.3	38.8	38.6	39.1
87.2	BXD 160	m1J	B6	M	2	38.3	37.8	39.1	38.9	38.9
94.1	BXD 160	m1J	B6	F	2	37.8	38.1	38.8	38.7	38.5
3.2	BXD 171	m1J	B6	F	2	38.1	37.8	38.4	38.4	38
3.5	BXD 171	m1J	B6	F	2	38.3	38.2	38.3	38.6	38.8
4.3	BXD 171	m1J	B6	M	2	37.2	37.4	37.3	37.5	38.1
99.1	BXD 171	m1J	B6	F	2	38.1	38.1	38.1	38.4	38.2
101.1	BXD 171	m1J	B6	M	2	36.4	37.9	38	37.8	37.2
142.3	BXD 171	m1J	B6	F	2	38.5	38.3	38	38.3	38.4
143.1	BXD 171	m1J	B6	M	2	37	38.5	38.1	38.3	38
151.2	BXD 171	m1J	B6	M	2	37.2	38	38.3	38.2	38.1
191.1	BXD 171	m1J	B6	F	2	38.2	36.8	38.1	37.5	37.1
192.2	BXD 171	m1J	B6	M	2	36.5	38.3	37.9	37.2	37
9.2	BXD 194	m1J	B6	F	2	38.1	38	38	38.2	38
9.5	BXD 194	m1J	B6	F	2	38.1	38.2	38.6	38.3	38.1
126.2	BXD 194	m1J	B6	F	2	37.8	37.9	38.3	38.5	38.3
127.2	BXD 194	m1J	B6	M	2	37.6	38.9	39.1	38.5	38.5
129.1	BXD 194	m1J	B6	M	2	38.4	38.6	39.2	39.2	39.1
130.2	BXD 194	m1J	B6	F	2	37.5	35.9	37.3	37.5	37.2
131.1	BXD 194	m1J	B6	M	2	38.6	38.5	38.4	38.4	38.2
139.2	BXD 194	m1J	B6	F	2	37.7	38.3	38.6	38.2	36.5
140.2	BXD 194	m1J	B6	M	2	38.3	37.8	38	38.3	38.1
161.1	BXD 194	m1J	B6	F	2	37.9	37.9	38.6	38.8	38.5
161.2	BXD 194	m1J	B6	F	2	38.2	38.3	38.4	38.4	37.9
162.1	BXD 194	m1J	B6	M	2	38.8	37.4	38.1	37.4	37.1
162.2	BXD 194	m1J	B6	M	2	39	38.6	38.7	38.8	38.5
163.3	BXD 194	m1J	B6	M	2	38.8	38.5	39.2	39.1	37.8
173.2	BXD 194	m1J	B6	M	2	39.3	38.6	39.4	39	38.4
45.2	BXD 178	m1J	D2	M	2	37.8	38	38.4	38.9	38.3
49.1	BXD 178	m1J	D2	F	2	38.1	38.6	38.6	38.6	38.5
50.2	BXD 178	m1J	D2	M	2	37.7	38.3	38.5	38.5	38.5
57.1	BXD 178	m1J	D2	F	2	37.7	38.2	38.3	38.3	38.4
57.3	BXD 178	m1J	D2	F	2	38.2	38.2	38.3	38.7	38.6
66.3	BXD 178	m1J	D2	M	2	37.1	37.6	38.4	38.5	38.7
67.3	BXD 178	m1J	D2	F	2	38.1	38.4	38.6	38.5	38.5
69.1	BXD 178	m1J	D2	F	2	38.3	38.3	38.3	38.6	38.5
78.1	BXD 178	m1J	D2	M	2	38.4	37.3	38	38.7	38.4
79.3	BXD 178	m1J	D2	F	2	38.1	38.1	38	38.6	38.4
81.1	BXD 178	m1J	D2	M	2	37.8	38.2	38.6	38.7	37.4
82.1	BXD 178	m1J	D2	M	2	37.1	38	37.7	38.1	38
159.1	BXD 178	m1J	D2	F	2	38	37.1	37.3	37.6	37.7
103.2	BXD 186	m1J	D2	M	2	37.5	37.9	37.3	37.5	37.1
132.2	BXD 186	m1J	D2	F	2	38.6	37.8	38.6	38.9	38.5
136.2	BXD 186	m1J	D2	M	2	39.1	38	38.5	38.1	37.6
148.2	BXD 186	m1J	D2	F	2	39	38.3	38.3	38.1	38.5
158.1	BXD 186	m1J	D2	M	2	38.5	38.9	39.1	38.7	38.4
168.2	BXD 186	m1J	D2	F	2	38.6	38.9	38.6	38.3	37.9
169.1	BXD 186	m1J	D2	M	2	37.6	38.2	39.2	38	36.9
181.2	BXD 186	m1J	D2	F	2	38.8	38.8	39	38.9	38.3
182.1	BXD 186	m1J	D2	F	2	38.1	38.2	38.4	38	37.4
195.2	BXD 186	m1J	D2	F	2	38.6	38.7	38.5	38.4	38.1
196.2	BXD 186	m1J	D2	M	2	38	38.7	39	39	38.3
30.3	BXD210	m1J	D2	F	2	37.8	38.5	38.3	38.1	38.1
31.1	BXD210	m1J	D2	M	2	36.8	38.5	38.8	38.5	37.2
31.4	BXD210	m1J	D2	M	2	36.3	37.5	38	37.6	37.8
109.1	BXD 210	m1J	D2	F	2	37.9	38.1	39.1	38.9	39
110.1	BXD 210	m1J	D2	M	2	37.4	38.5	38.2	38.2	37.9
141.1	BXD 210	m1J	D2	F	2	38.3	38.4	38.4	38.6	38.5
153.2	BXD 210	m1J	D2	F	2	38.5	38.2	38.6	38.6	38.7
154.2	BXD 210	m1J	D2	M	2	37.2	37.7	37.7	38.1	37.4
170.2	BXD 210	m1J	D2	F	2	38.5	38.4	38.8	39	38.5
193.2	BXD 210	m1J	D2	M	2	39.3	40.1	39.7	39.5	38.8
124.2	BXD 216	m1J	D2	F	2	37.8	39	39.2	38.9	38.6
124.5	BXD 216	m1J	D2	F	2	37.7	39.4	38.9	39	39
125.2	BXD 216	m1J	D2	M	2	38.2	39.1	39.3	39.2	39.3
125.4	BXD 216	m1J	D2	M	2	38.5	39.3	39.5	40	39.6
133.2	BXD 216	m1J	D2	F	2	38.1	38.2	38.4	36.1	38.4
147.3	BXD 216	m1J	D2	M	2	38.3	38.4	39.3	38	38.7
149.2	BXD 216	m1J	D2	F	2	38.4	39.1	39.5	39.4	39.3
165.2	BXD 216	m1J	D2	F	2	38	38.4	38.6	38.8	38.2
166.1	BXD 216	m1J	D2	M	2	37.1	37.5	37.6	37.6	36.8
176.2	BXD 216	m1J	D2	F	2	38.4	38.5	39.1	39.1	38.5
177.2	BXD 216	m1J	D2	M	2	37.7	39.1	39.4	38.9	38.3
180.1	BXD 216	m1J	D2	M	2	37.8	39	38.2	39.1	38.5
194.2	BXD 216	m1J	D2	F	2	38.4	39.1	39.4	39.1	38.7
