# Supplementary material for: Taar1 gene variants have a causal role in methamphetamine intake and response and interact with Oprm1
Source: eLife. 2019 Jul 9;8:e46472. doi: 10.7554/eLife.46472 (PMC6682400; doi:10.7554/eLife.46472)
Supplement: Figure 7—source data 1. [file elife-46472-fig7-data1.xlsx]

## Sheet: Sheet1
BXD Strain	Mean 40 mg/l MA consumption (mg/kg/18h)	Mean 2 mgkg MA response, T30 - T0
BXD 113	3.733	0.84
BXD 154	0.099	-0.921429
BXD 160	4.13	-0.3
BXD 161	0.462	-4.11111
BXD 171	3.875	0.38
BXD 178	5.34	0.146154
BXD 184	0.095	-1.33636
BXD 186	4.719	-6.45948e-16
BXD 194	2.857	-0.18
BXD 196	0.145	-1.625
BXD 199	0.569	-2.91
BXD 204	3.284	X
BXD 205	0.168	-1.55
BXD 210	6.414	0.59
BXD 212	0.026	X
BXD 215	0.329	X
BXD 216	5.509	0.746154
BXD 218	0.246	-1.3
